# Supplementary material
Source: PubMed Central journal article supplement (PMC4178595)
Supplement: AEM.01489-14_zam999105653so1.pdf [file AEM.01489-14_zam999105653so1.pdf]

**SUPPLEMENTAL MATERIAL:**

**Table S1: List of genes differentially expressed 2-fold or more in the RNA-Seq data**

| Accession number | Locus tag in v5b | Gene name                | Protein product                                                                              | Fold <sup>a</sup> regulation |
|------------------|------------------|--------------------------|----------------------------------------------------------------------------------------------|------------------------------|
| ACV-0290526      | CKS-0458         |                          | Sigma-fimbriae uncharacterized paralogous subunit                                            | 11.5 (R)                     |
| ACV-0288878      | CKS-4672         | <i>yjbE</i>              | YjbE secreted protein                                                                        | 7.7 (R)                      |
| ACV-0290502      | CKS-0482         | <i>dkgA</i>              | Methylglyoxal reductase, acetol producing / 2,5-diketo-D-gluconate reductase A               | 6.8 (R)                      |
| ACV-0286343      | CKS-4376         |                          | Putative transcriptional regulator                                                           | 6.8 (R)                      |
| ACV-0287180      | CKS-1103         |                          | Conidiation-specific protein 10                                                              | 6.7 (R)                      |
| ACV-0290434      | CKS-0551         |                          | Carbonic anhydrase                                                                           | 6.3 (R)                      |
| ACV-0290065      | CKS-3595         |                          | L-sorbose dehydrogenase                                                                      | 6.2 (R)                      |
| ACV-0290380      | CKS-0606         | <i>yciF</i>              | Protein YciF                                                                                 | 5.8 (R)                      |
| ACV-0288895      | CKS-4689         |                          | Conjugative transfer protein                                                                 | 5.8 (R)                      |
| ACV-0285957      | CKS-2570         | <i>rcaA</i>              | Colanic acid capsular biosynthesis activation accessory protein RcsA, co-regulator with RcsB | 5.8 (R)                      |
| ACV-0288505      | CKS-0881         |                          | Protein of unknown function DUF1471                                                          | 5.8 (R)                      |
| ACV-0290433      | CKS-0552         |                          | Sulfate permease                                                                             | 5.6 (R)                      |
| ACV-0286467      | CKS-3219         |                          | Cellulose synthase (UDP-forming)                                                             | 5.2 (R)                      |
| ACV-0290523      | CKS-0461         |                          | Sigma-fimbriae usher protein                                                                 | 5.1 (R)                      |
| ACV-0289538      | CKS-2247         | <i>wceL</i>              | Exopolysaccharide biosynthesis protein                                                       | 4.7 (R)                      |
| ACV-0285928      | CKS-2108         |                          | Putative type I secretion protein                                                            | 4.5 (R)                      |
| ACV-0290525      | CKS-0459         |                          | Sigma-fimbriae uncharacterized paralogous subunit                                            | 4.4 (R)                      |
| ACV-0289613      | CKS-2172         | <i>lysP</i>              | Lysine-specific permease                                                                     | 4.4 (R)                      |
| ACV-0287610      | CKS-5070         | <i>osmY</i>              | Osmotically inducible protein OsmY                                                           | 4.3 (R)                      |
| ACV-0288876      | CKS-4670         | <i>ymcB</i>              | Putative uncharacterized protein YmcB                                                        | 4.3 (R)                      |
| ACV-0286879      | CKS-2708         | <i>wceG</i> <sub>2</sub> | Undecaprenyl-phosphate galactose phosphotransferase                                          | 4.2 (R)                      |
| ACV-0291148      | CKS-1361         | <i>lysA</i>              | Diaminopimelate decarboxylase                                                                | 4.2 (R)                      |
| ACV-0285930      | CKS-2110         |                          | Putative ATP-binding component of a transport system                                         | 4.1 (R)                      |
| ACV-0287973      | CKS-1762         |                          | Permease of the drug/metabolite transporter (DMT) superfamily                                | 4.1 (R)                      |
| ACV-0287347      | CKS-2413         | <i>elaB</i>              | Protein of unknown function DUF883, ElaB                                                     | 4.0 (R)                      |
| ACV-0289537      | CKS-2248         |                          | Glycosyl transferase, family 2                                                               | 3.9 (R)                      |
| ACV-0287576      | CKS-5036         |                          | Inositol-1-monophosphatase                                                                   | 3.9 (R)                      |
| ACV-0288877      | CKS-4671         |                          | Predicted outer membrane lipoprotein                                                         | 3.8 (R)                      |
| ACV-0288287      | CKS-4120         |                          | Putative bacteriophage protein                                                               | 3.8 (R)                      |

|             |          |             |                                                                             |         |
|-------------|----------|-------------|-----------------------------------------------------------------------------|---------|
| ACV-0291122 | CKS-1333 | <i>ygdI</i> | Putative lipoprotein                                                        | 3.7 (R) |
| ACV-0285999 | CKS-2612 |             | Phage holin                                                                 | 3.6 (R) |
| ACV-0290321 | CKS-0665 | <i>yqjD</i> | Uncharacterized membrane protein YqjD                                       | 3.6 (R) |
| ACV-0291056 | CKS-1267 | <i>mltB</i> | Membrane-bound lytic murein transglycosylase B precursor                    | 3.6 (R) |
| ACV-0288281 | CKS-4114 |             | Putative bacteriophage protein                                              | 3.6 (R) |
| ACV-0288286 | CKS-4119 |             | Putative bacteriophage protein                                              | 3.5 (R) |
| ACV-0288284 | CKS-4117 |             | Putative bacteriophage protein                                              | 3.5 (R) |
| ACV-0285948 | CKS-2561 | <i>yodC</i> | Putative cytoplasmic protein                                                | 3.5 (R) |
| ACV-0288290 | CKS-4123 |             | Putative bacteriophage protein                                              | 3.5 (R) |
| ACV-0286176 | CKS-4567 |             | Secretion system regulator of DegU/UvrY/BvgA type                           | 3.5 (R) |
| ACV-0288302 | CKS-4135 |             | Putative bacteriophage protein                                              | 3.4 (R) |
| ACV-0289276 | CKS-3527 |             | Conidiation-specific protein 10                                             | 3.4 (R) |
| ACV-0286473 | CKS-3213 |             | Sensory box histidine kinase/response regulator                             | 3.4 (R) |
| ACV-0288288 | CKS-4121 |             | Putative bacteriophage protein                                              | 3.4 (R) |
| ACV-0290322 | CKS-0664 | <i>yqjC</i> | Periplasmic protein YqjC                                                    | 3.4 (R) |
| ACV-0289540 | CKS-2245 | <i>etp</i>  | Low molecular weight protein-tyrosine-phosphatase Wzb                       | 3.4 (R) |
| ACV-0290611 | CKS-0373 |             | PTS system, cellobiose-specific IIB component                               | 3.4 (R) |
| ACV-0288283 | CKS-4116 |             | Putative bacteriophage protein                                              | 3.4 (R) |
| ACV-0289544 | CKS-2241 |             | Undecaprenol-phosphate galactosephosphotransferase/O-antigen transferase    | 3.4 (R) |
| ACV-0286146 | CKS-4537 |             | Pathogenicity 1 island effector protein                                     | 3.3 (R) |
| ACV-0290342 | CKS-0644 |             | Diaminobutyrate-pyruvate transaminase & L-2,4-diaminobutyrate decarboxylase | 3.3 (R) |
| ACV-0285656 | CKS-1834 |             | Glycerol dehydrogenase                                                      | 3.3 (R) |
| ACV-0288871 | CKS-4665 |             | Putative oligogalacturonide transporter                                     | 3.2 (R) |
| ACV-0289663 | CKS-2121 |             | Sugar (Glycoside-Pentoside-Hexuronide) transporter                          | 3.2 (R) |
| ACV-0286016 | CKS-2629 |             | Phage tail sheath protein FI                                                | 3.2 (R) |
| ACV-0287057 | CKS-1226 | <i>rbsD</i> | Ribose ABC transport system, high affinity permease RbsD                    | 3.2 (R) |
| ACV-0286242 | CKS-4633 |             | Haemolysin expression modulating protein                                    | 3.2 (R) |
| ACV-0288977 | CKS-4771 |             | Acytransferase 3                                                            | 3.2 (R) |
| ACV-0288285 | CKS-4118 |             | Putative bacteriophage protein                                              | 3.2 (R) |
| ACV-0289287 | CKS-3516 |             | Oligogalacturonide transporter                                              | 3.2 (R) |
| ACV-0285929 | CKS-2109 |             | Putative cytoplasmic membrane export protein                                | 3.1 (R) |
| ACV-0288294 | CKS-4127 |             | Putative bacteriophage protein                                              | 3.1 (R) |
| ACV-0288875 | CKS-4669 | <i>yjbH</i> | YjbH outer membrane lipoprotein                                             | 3.1 (R) |

|             |          |             |                                                    |         |
|-------------|----------|-------------|----------------------------------------------------|---------|
| ACV-0286703 | CKS-2983 |             | Phytochelatin synthase, bacterial type             | 3.1 (R) |
| ACV-0286848 | CKS-2740 | <i>hns</i>  | DNA-binding protein H-NS                           | 3.1 (R) |
| ACV-0290230 | CKS-2767 |             | Putative lipoprotein                               | 3.1 (R) |
| ACV-0286463 | CKS-3223 |             | Response regulator                                 | 3.0 (R) |
| ACV-0290379 | CKS-0607 | <i>yciE</i> | Protein YciE                                       | 3.0 (R) |
| ACV-0288276 | CKS-4109 |             | Putative bacteriophage protein                     | 3.0 (R) |
| ACV-0288292 | CKS-4125 |             | Putative bacteriophage protein                     | 3.0 (R) |
| ACV-0286560 | CKS-3126 | <i>yebG</i> | Hypothetical protein                               | 3.0 (R) |
| ACV-0287846 | CKS-2944 | <i>malT</i> | Transcriptional activator of maltose regulon, malt | 2.9 (R) |
| ACV-0288282 | CKS-4115 |             | Putative bacteriophage protein                     | 2.9 (R) |
| ACV-0290781 | CKS-0202 | <i>ybaY</i> | Glycoprotein-polysaccharide metabolism             | 2.9 (R) |
| ACV-0288293 | CKS-4126 |             | Putative bacteriophage protein                     | 2.9 (R) |
| ACV-0289712 | CKS-3319 | <i>yehH</i> | Probable membrane protein YPO2012                  | 2.9 (R) |
| ACV-0287445 | CKS-3703 |             | L-fucose operon activator                          | 2.8 (R) |
| ACV-0289985 | CKS-0827 |             | DNA topoisomerase III                              | 2.8 (R) |
| ACV-0289531 | CKS-2254 | <i>wzxC</i> | Lipopolysaccharide biosynthesis protein WzxC       | 2.8 (R) |
| ACV-0286735 | CKS-5564 |             | Cro repressor                                      | 2.8 (R) |
| ACV-0289331 | CKS-3472 | <i>katE</i> | Catalase                                           | 2.8 (R) |
| ACV-0289539 | CKS-2246 |             | Tyrosine-protein kinase Wzc                        | 2.8 (R) |
| ACV-0286491 | CKS-3195 | <i>fliD</i> | Flagellar hook-associated protein FliD             | 2.8 (R) |
| ACV-0288017 | CKS-1718 |             | ABC transporter, permease protein                  | 2.8 (R) |
| ACV-0289060 | CKS-4855 | <i>blc</i>  | Outer membrane lipoprotein Blc                     | 2.8 (R) |
| ACV-0288793 | CKS-1592 |             | Bacterioferritin-associated ferredoxin             | 2.8 (R) |
| ACV-0285912 | CKS-2092 | <i>elaB</i> | Elab protein                                       | 2.8 (R) |
| ACV-0287598 | CKS-5058 |             | Putative starvation-inducible protein              | 2.7 (R) |
| ACV-0287316 | CKS-2444 |             | Bicupin, oxalate decarboxylase family              | 2.7 (R) |
| ACV-0286081 | CKS-5373 |             | Mobilization protein                               | 2.7 (R) |
| ACV-0288949 | CKS-4743 |             | Ferrous iron transport protein A                   | 2.6 (R) |
| ACV-0285833 | CKS-2013 | <i>yfcZ</i> | Hypothetical protein                               | 2.6 (R) |
| ACV-0287611 | CKS-5071 | <i>ytjA</i> | Hypothetical protein                               | 2.6 (R) |
| ACV-0288301 | CKS-4134 |             | Putative bacteriophage protein                     | 2.6 (R) |
| ACV-0290341 | CKS-0645 |             | Putative siderophore biosynthetic enzyme           | 2.6 (R) |
| ACV-0287980 | CKS-1755 |             | Isehe3 orfb                                        | 2.6 (R) |
| ACV-0290522 | CKS-0462 |             | Sigma-fimbriae usher protein                       | 2.6 (R) |
| ACV-0289580 | CKS-2205 |             | DEAD/DEAH box helicase domain protein              | 2.6 (R) |
| ACV-0288194 | CKS-4025 | <i>ycbW</i> | Hypothetical protein                               | 2.6 (R) |
| ACV-0285958 | CKS-2571 | <i>fliR</i> | Flagellar biosynthesis protein FliR                | 2.5 (R) |
| ACV-0286178 | CKS-4569 |             | Secreted effector protein                          | 2.5 (R) |
| ACV-0287392 | CKS-2368 |             | Protein gp55 precursor                             | 2.5 (R) |
| ACV-0290524 | CKS-0460 |             | Sigma-fimbriae chaperone protein                   | 2.5 (R) |

|             |          |             |                                                                                                                                                |         |
|-------------|----------|-------------|------------------------------------------------------------------------------------------------------------------------------------------------|---------|
| ACV-0286337 | CKS-4370 | <i>yibL</i> | Hypothetical protein                                                                                                                           | 2.5 (R) |
| ACV-0288299 | CKS-4132 |             | Phage-related protein                                                                                                                          | 2.5 (R) |
| ACV-0288303 | CKS-4136 |             | Putative bacteriophage tail protein                                                                                                            | 2.5 (R) |
| ACV-0290571 | CKS-0413 |             | Protein gp47                                                                                                                                   | 2.5 (R) |
| ACV-0285931 | CKS-2111 |             | Putative protein secretion efflux system, membrane fusion protein (hemolysin-type secretion transmembrane protein) (superfamily ABC, membrane) | 2.5 (R) |
| ACV-0291295 | CKS-3815 |             | Probable secreted protein                                                                                                                      | 2.5 (R) |
| ACV-0288416 | CKS-0970 | <i>uspB</i> | Universal stress protein B                                                                                                                     | 2.5 (R) |
| ACV-0285655 | CKS-1833 |             | Putative lyse family transporter                                                                                                               | 2.5 (R) |
| ACV-0289536 | CKS-2249 |             | Putative glycosyl transferase                                                                                                                  | 2.4 (R) |
| ACV-0288222 | CKS-4055 | <i>yccJ</i> | Hypothetical protein                                                                                                                           | 2.4 (R) |
| ACV-0287216 | CKS-2545 |             | Putative MFS transporter                                                                                                                       | 2.4 (R) |
| ACV-0288740 | CKS-1539 |             | Extracellular metalloprotease                                                                                                                  | 2.4 (R) |
| ACV-0285724 | CKS-1903 |             | Gifsy-1 prophage ci                                                                                                                            | 2.4 (R) |
| ACV-0285615 | CKS-1793 | <i>mdtJ</i> | Spermidine export protein MdtJ                                                                                                                 | 2.4 (R) |
| ACV-0286541 | CKS-3145 |             | Na <sup>+</sup> /solute symporter                                                                                                              | 2.4 (R) |
| ACV-0286474 | CKS-3212 |             | COG3250: Beta-galactosidase/beta-glucuronidase                                                                                                 | 2.4 (R) |
| ACV-0286147 | CKS-4538 |             | Type III secretion apparatus                                                                                                                   | 2.4 (R) |
| ACV-0287848 | CKS-2942 |             | GCN5-related N-acetyltransferase                                                                                                               | 2.4 (R) |
| ACV-0290452 | CKS-0533 |             | Putative periplasmic protein                                                                                                                   | 2.4 (R) |
| ACV-0285925 | CKS-2105 |             | Large repetitive protein                                                                                                                       | 2.4 (R) |
| ACV-0290819 | CKS-0164 |             | Major tail tube protein                                                                                                                        | 2.4 (R) |
| ACV-0290231 | CKS-2766 | <i>ompW</i> | Outer membrane protein W precursor                                                                                                             | 2.4 (R) |
| ACV-0289726 | CKS-3333 | <i>chaB</i> | Cation transport regulator ChaB                                                                                                                | 2.4 (R) |
| ACV-0291048 | CKS-1259 |             | Carbon storage regulator                                                                                                                       | 2.3 (R) |
| ACV-0290836 | CKS-0147 |             | Phage major capsid protein #Fam0066                                                                                                            | 2.3 (R) |
| ACV-0288415 | CKS-0971 | <i>uspA</i> | Universal stress protein A                                                                                                                     | 2.3 (R) |
| ACV-0288263 | CKS-4096 |             | Putative CI repressor                                                                                                                          | 2.3 (R) |
| ACV-0290049 | CKS-3579 |             | Hypothetical transporter YidO, benzoate like (BenE), MFS superfamily                                                                           | 2.3 (R) |
| ACV-0288409 | CKS-0977 |             | Putative CI repressor                                                                                                                          | 2.3 (R) |
| ACV-0286159 | CKS-4550 | <i>fliC</i> | Flagellar biosynthesis protein FliC                                                                                                            | 2.3 (R) |
| ACV-0289541 | CKS-2244 |             | Polysaccharide export protein                                                                                                                  | 2.3 (R) |
| ACV-0285616 | CKS-1794 | <i>mdtI</i> | Spermidine export protein MdtI                                                                                                                 | 2.3 (R) |
| ACV-0288792 | CKS-1591 | <i>bfr</i>  | Bacterioferritin                                                                                                                               | 2.3 (R) |
| ACV-0289059 | CKS-4854 | <i>ecnB</i> | Hypothetical protein                                                                                                                           | 2.3 (R) |
| ACV-0285956 | CKS-2569 | <i>trg</i>  | Methyl-accepting chemotaxis protein III (ribose and galactose chemoreceptor protein)                                                           | 2.3 (R) |
| ACV-0288295 | CKS-4128 |             | Putative bacteriophage protein                                                                                                                 | 2.3 (R) |
| ACV-0286131 | CKS-4522 |             | Type III secretion chaperone protein for                                                                                                       | 2.3 (R) |

|             |          |             | YopD (SycD)                                                                                                      |         |
|-------------|----------|-------------|------------------------------------------------------------------------------------------------------------------|---------|
| ACV-0288310 | CKS-4143 | <i>cycA</i> | D-serine/D-alanine/glycine transporter                                                                           | 2.2 (R) |
| ACV-0289123 | CKS-4920 | <i>yhbO</i> | ThiJ/PfpI family protein                                                                                         | 2.2 (R) |
| ACV-0288451 | CKS-0935 | <i>yhhQ</i> | Putative preq0 transporter                                                                                       | 2.2 (R) |
| ACV-0287802 | CKS-5262 | <i>dxr</i>  | 1-deoxy-D-xylulose 5-phosphate reductoisomerase                                                                  | 2.2 (R) |
| ACV-0288137 | CKS-3968 | <i>cspD</i> | Cold shock proteinCspD                                                                                           | 2.2 (R) |
| ACV-0287487 | CKS-3898 |             | Resolvase                                                                                                        | 2.2 (R) |
| ACV-0287296 | CKS-2464 |             | Formate dehydrogenase related protein                                                                            | 2.2 (R) |
| ACV-0290558 | CKS-0426 |             | Putative membrane protein                                                                                        | 2.2 (R) |
| ACV-0286754 | CKS-5584 |             | Membrane glycoprotein                                                                                            | 2.2 (R) |
| ACV-0286133 | CKS-4524 |             | Type III secretion inner membrane protein (ysct,hrct,spar,esct,epar1, homologous to flagellar export components) | 2.2 (R) |
| ACV-0290490 | CKS-0494 |             | Probable PTS system regulatory protein                                                                           | 2.2 (R) |
| ACV-0290639 | CKS-0345 |             | Filamentous haemagglutinin family outer membrane protein                                                         | 2.2 (R) |
| ACV-0289733 | CKS-3340 | <i>impM</i> | Protein phosphatase ImpM                                                                                         | 2.1 (R) |
| ACV-0288356 | CKS-1030 | <i>ybdJ</i> | Putative inner membrane protein                                                                                  | 2.1 (R) |
| ACV-0288759 | CKS-1558 | <i>mscL</i> | Large-conductance mechanosensitive channel                                                                       | 2.1 (R) |
| ACV-0286947 | CKS-4182 | <i>msyB</i> | Acidic protein MsyB                                                                                              | 2.1 (R) |
| ACV-0290319 | CKS-0667 | <i>yqjK</i> | Inner membrane protein YqjK                                                                                      | 2.1 (R) |
| ACV-0290634 | CKS-0350 |             | Filamentous haemagglutinin family outer membrane protein                                                         | 2.1 (R) |
| ACV-0287318 | CKS-2442 | <i>aldB</i> | Aldehyde dehydrogenase                                                                                           | 2.1 (R) |
| ACV-0289200 | CKS-5001 |             | Fimbrial protein precursor                                                                                       | 2.1 (R) |
| ACV-0288317 | CKS-4150 | <i>uvrY</i> | Bara-associated response regulator UvrY                                                                          | 2.1 (R) |
| ACV-0290092 | CKS-2905 |             | Predicted sugar transporter                                                                                      | 2.1 (R) |
| ACV-0289765 | CKS-3372 | <i>astE</i> | Succinylglutamate desuccinylase                                                                                  | 2.1 (R) |
| ACV-0289333 | CKS-3470 |             | Malto-oligosyltrehalose synthase                                                                                 | 2.1 (R) |
| ACV-0290320 | CKS-0666 | <i>yqjE</i> | Inner membrane protein YqjE                                                                                      | 2.1 (R) |
| ACV-0289713 | CKS-3320 |             | GGDEF domain protein                                                                                             | 2.1 (R) |
| ACV-0286141 | CKS-4532 |             | Type III secretion system apparatus protein                                                                      | 2.1 (R) |
| ACV-0287381 | CKS-2379 |             | NUDIX hydrolase                                                                                                  | 2.1 (R) |
| ACV-0286540 | CKS-3146 |             | Dihydrodipicolinate synthase                                                                                     | 2.1 (R) |
| ACV-0290158 | CKS-2839 | <i>ydbJ</i> | Probable lipoprotein YPO2331                                                                                     | 2.1 (R) |
| ACV-0290648 | CKS-0336 |             | Glycerol metabolism operon regulatory protein                                                                    | 2.0 (R) |
| ACV-0291055 | CKS-1266 | <i>phnA</i> | Alkylphosphonate utilization operon protein PhnA                                                                 | 2.0 (R) |
| ACV-0288300 | CKS-4133 |             | Putative bacteriophage protein                                                                                   | 2.0 (R) |
| ACV-0289262 | CKS-3541 |             | Oxidoreductase domain protein                                                                                    | 2.0 (R) |

|             |          |             |                                                                                      |         |
|-------------|----------|-------------|--------------------------------------------------------------------------------------|---------|
| ACV-0289533 | CKS-2252 | <i>wcaK</i> | Colanic acid biosynthesis protein WcaK                                               | 2.0 (R) |
| ACV-0289468 | CKS-2317 | <i>yeeX</i> | Hypothetical protein                                                                 | 2.0 (R) |
| ACV-0287480 | CKS-3905 |             | IS911 orfa                                                                           | 2.0 (R) |
| ACV-0288910 | CKS-4704 |             | Glutathione S-transferase                                                            | 2.0 (R) |
| ACV-0287438 | CKS-3710 |             | Citrate carrier protein                                                              | 2.0 (R) |
| ACV-0290095 | CKS-2902 | <i>yghA</i> | Putative oxidoreductase                                                              | 2.0 (R) |
| ACV-0286079 | CKS-5371 |             | DNA topoisomerase III                                                                | 2.0 (R) |
| ACV-0286883 | CKS-2704 | <i>ycgB</i> | Putative sporulation protein                                                         | 2.0 (R) |
| ACV-0286153 | CKS-4544 |             | Lytic transglycosylase, catalytic                                                    | 2.0 (R) |
| ACV-0289525 | CKS-2260 |             | Undecaprenyl-phosphate N-acetylglucosaminyl 1-phosphate transferase                  | 2.0 (R) |
| ACV-0286180 | CKS-4571 |             | Virulence protein                                                                    | 2.0 (R) |
| ACV-0287730 | CKS-5190 | <i>ampD</i> | N-acetylmuramoyl-L-alanine amidase<br>ampd                                           | 2.0 (R) |
| ACV-0291279 | CKS-3797 | <i>ybgC</i> | 4-hydroxybenzoyl-coa thioesterase family                                             | 2.0 (A) |
| ACV-0291071 | CKS-1282 | <i>cysN</i> | Sulfate adenylyltransferase subunit 1                                                | 2.0 (A) |
| ACV-0286673 | CKS-3013 |             | L-2,4-diaminobutyrate decarboxylase                                                  | 2.0 (A) |
| ACV-0286487 | CKS-3199 |             | Putative transcriptional regulator                                                   | 2.0 (A) |
| ACV-0286416 | CKS-3270 |             | HrpF protein ( <i>hrp</i> cluster)                                                   | 2.0 (A) |
| ACV-0286633 | CKS-3053 |             | Homoserine/homoserine lactone efflux protein                                         | 2.0 (A) |
| ACV-0290056 | CKS-3586 |             | Phosphotransferase system<br>lactose/cellobiose-specific IIB subunit                 | 2.0 (A) |
| ACV-0288879 | CKS-4673 | <i>pgi</i>  | Glucose-6-phosphate isomerase                                                        | 2.0 (A) |
| ACV-0286664 | CKS-3022 |             | Anion transporter                                                                    | 2.0 (A) |
| ACV-0286288 | CKS-4321 |             | 2-ketogluconate utilization repressor ptxs                                           | 2.0 (A) |
| ACV-0286674 | CKS-3012 |             | Diaminobutyrate--2-oxoglutarate<br>aminotransferase                                  | 2.0 (A) |
| ACV-0290953 | CKS-0001 | <i>purH</i> | IMP cyclohydrolase /<br>Phosphoribosylaminoimidazolecarboxamide<br>formyltransferase | 2.1 (A) |
| ACV-0289042 | CKS-4836 |             | Aldo-keto reductase                                                                  | 2.1 (A) |
| ACV-0290302 | CKS-0684 | <i>diaA</i> | Phosphoheptose isomerase                                                             | 2.1 (A) |
| ACV-0288462 | CKS-0924 |             | Putative acetyltransferase                                                           | 2.1 (A) |
| ACV-0287497 | CKS-3888 |             | ArdR protein                                                                         | 2.1 (A) |
| ACV-0289133 | CKS-4930 | <i>ftsI</i> | Cell division protein FtsI [Peptidoglycan<br>synthetase]                             | 2.1 (A) |
| ACV-0285631 | CKS-1809 |             | Protease II                                                                          | 2.1 (A) |
| ACV-0290872 | CKS-0110 | <i>lexA</i> | SOS-response repressor and protease<br>LexA                                          | 2.1 (A) |
| ACV-0289168 | CKS-4965 |             | Extracellular solute-binding protein,<br>family 5                                    | 2.1 (A) |
| ACV-0289058 | CKS-4853 | <i>ecnA</i> | Hypothetical protein                                                                 | 2.1 (A) |

|             |          |             |                                                                                              |         |
|-------------|----------|-------------|----------------------------------------------------------------------------------------------|---------|
| ACV-0287177 | CKS-1106 | <i>cpxR</i> | Copper-sensing two-component system response regulator CpxR                                  | 2.1 (A) |
| ACV-0286411 | CKS-3275 | <i>hrpN</i> | Elicitor of the hypersensitivity reaction HrpN ( <i>hrp</i> cluster)                         | 2.1 (A) |
| ACV-0287013 | CKS-4248 | <i>ndh</i>  | NADH dehydrogenase                                                                           | 2.1 (A) |
| ACV-0288326 | CKS-1771 |             | Formate efflux transporter                                                                   | 2.2 (A) |
| ACV-0289322 | CKS-3481 | <i>tppB</i> | Di/tripeptide permease DtpA                                                                  | 2.2 (A) |
| ACV-0291078 | CKS-1289 |             | Endoribonuclease L-PSP                                                                       | 2.2 (A) |
| ACV-0287320 | CKS-2440 |             | Glutamine amidotransferase                                                                   | 2.2 (A) |
| ACV-0287426 | CKS-3722 | <i>tatE</i> | Twin-arginine translocation protein TatE                                                     | 2.2 (A) |
| ACV-0286882 | CKS-2705 |             | D-amino acid dehydrogenase small subunit                                                     | 2.2 (A) |
| ACV-0286239 | CKS-4630 |             | Cellulase                                                                                    | 2.2 (A) |
| ACV-0285737 | CKS-1916 |             | Endodeoxyribonuclease RusA                                                                   | 2.2 (A) |
| ACV-0286270 | CKS-4303 | <i>dtd</i>  | D-tyrosyl-trna(Tyr) deacylase                                                                | 2.2 (A) |
| ACV-0291281 | CKS-3799 | <i>tolR</i> | Tol biopolymer transport system, TolR protein                                                | 2.3 (A) |
| ACV-0286568 | CKS-3118 |             | Hypothetical transmembrane protein coupled to NADH-ubiquinone oxidoreductase chain 5 homolog | 2.3 (A) |
| ACV-0289622 | CKS-2163 | <i>fruB</i> | Fructose-specific phosphocarrier protein HPR / PTS system, fructose-specific IIA component   | 2.3 (A) |
| ACV-0291280 | CKS-3798 | <i>tolQ</i> | MotA/TolQ/ExbB proton channel family protein                                                 | 2.3 (A) |
| ACV-0286034 | CKS-2647 |             | OspG                                                                                         | 2.3 (A) |
| ACV-0287580 | CKS-5040 |             | Methionine synthase, vitamin-B12 independent                                                 | 2.3 (A) |
| ACV-0289470 | CKS-2315 | <i>dacD</i> | D-alanyl-D-alanine carboxypeptidase                                                          | 2.3 (A) |
| ACV-0290242 | CKS-2755 | <i>yciU</i> | Hypothetical protein                                                                         | 2.4 (A) |
| ACV-0287014 | CKS-4249 | <i>ycfJ</i> | Putative exported protein                                                                    | 2.4 (A) |
| ACV-0288517 | CKS-0869 | <i>yrfF</i> | IgaA: a membrane protein that prevents overactivation of the Rcs regulatory system           | 2.4 (A) |
| ACV-0290793 | CKS-0190 | <i>ykgM</i> | Putative ribosomal protein                                                                   | 2.4 (A) |
| ACV-0289327 | CKS-3476 |             | Membrane-bound lysozyme inhibitor of c-type lysozyme                                         | 2.4 (A) |
| ACV-0288393 | CKS-0993 |             | Inositol-1-monophosphatase                                                                   | 2.5 (A) |
| ACV-0288510 | CKS-0876 | <i>ompR</i> | Two-component system response regulator OmpR                                                 | 2.5 (A) |
| ACV-0288957 | CKS-4751 |             | Endo-1,4-beta-xylanase                                                                       | 2.5 (A) |
| ACV-0290308 | CKS-0678 |             | C-terminal fragment of a PLP-dependent catabolic threonine dehydratase                       | 2.6 (A) |
| ACV-0290288 | CKS-0698 |             | Putative inner membrane protein                                                              | 2.6 (A) |
| ACV-0289585 | CKS-2200 | <i>ahpF</i> | Alkyl hydroperoxide reductase protein F                                                      | 2.6 (A) |

|             |          |             |                                                                                     |         |
|-------------|----------|-------------|-------------------------------------------------------------------------------------|---------|
| ACV-0291275 | CKS-3793 |             | Cytochrome d ubiquinol oxidase subunit I                                            | 2.6 (A) |
| ACV-0291072 | CKS-1283 | <i>cysD</i> | Sulfate adenylyltransferase subunit 2                                               | 2.6 (A) |
| ACV-0288385 | CKS-1001 |             | Possible ABC transporter, periplasmic substrate X binding protein precursor         | 2.6 (A) |
| ACV-0287591 | CKS-5051 | <i>yaiE</i> | Cytoplasmic protein YaiE                                                            | 2.7 (A) |
| ACV-0286569 | CKS-3117 |             | NADH dehydrogenase, subunit 5                                                       | 2.7 (A) |
| ACV-0286289 | CKS-4322 |             | Periplasmic binding protein/LacI transcriptional regulator                          | 2.7 (A) |
| ACV-0287790 | CKS-5250 | <i>degP</i> | HtrA protease/chaperone protein                                                     | 2.8 (A) |
| ACV-0286426 | CKS-3260 |             | Nitrate/nitrite sensor protein                                                      | 2.9 (A) |
| ACV-0288744 | CKS-1543 |             | Lipase                                                                              | 2.9 (A) |
| ACV-0290791 | CKS-0192 |             | COG0803: ABC-type metal ion transport system, periplasmic component/surface adhesin | 3.0 (A) |
| ACV-0287183 | CKS-1100 | <i>sbp</i>  | Sulfate-binding protein Sbp                                                         | 3.0 (A) |
| ACV-0288306 | CKS-4139 |             | Putative DNA damage-inducible protein                                               | 3.1 (A) |
| ACV-0285895 | CKS-2075 |             | Lysr family transcriptional regulator LrhA                                          | 3.2 (A) |
| ACV-0287319 | CKS-2441 |             | Methyltransferase                                                                   | 3.2 (A) |
| ACV-0289810 | CKS-3417 | <i>sufE</i> | Sulfur acceptor protein SufE for iron-sulfur cluster assembly                       | 3.2 (A) |
| ACV-0289269 | CKS-3534 |             | Membrane-fusion protein                                                             | 3.3 (A) |
| ACV-0285804 | CKS-1984 |             | Phage-related protein                                                               | 3.6 (A) |
| ACV-0289993 | CKS-0835 |             | Atpase involved in chromosome partitioning                                          | 4.7 (A) |
| ACV-0290094 | CKS-2903 | <i>esaR</i> | Quorum-sensing transcriptional activator EsaRsar                                    | 5.4 (A) |
| ACV-0290191 | CKS-2806 |             | Putative formate dehydrogenase oxidoreductase protein                               | 5.5 (A) |
| ACV-0285632 | CKS-1810 | <i>yebE</i> | Hypothetical protein                                                                | 6.3 (A) |
| ACV-0290093 | CKS-2904 | <i>esaI</i> | N-3-oxooctanoyl-L-homoserine lactone synthase                                       | 7.3 (A) |
| ACV-0290388 | CKS-0598 |             | Methyl-accepting chemotaxis sensory transducer                                      | 7.6 (A) |
| ACV-0289766 | CKS-3373 | <i>spy</i>  | Periplasmic protein related to spheroblast formation                                | 9.7 (A) |

<sup>a</sup> (A) denotes fold activation, (R) denotes fold repression by EsaR as seen in the RNA-Seq data.



**Table S2: List of hypothetical-protein encoding genes differentially expressed 2-fold or more in the RNA-Seq data**

| <b>Accession number</b> | <b>Locus Tag</b> | <b>Protein product</b> | <b>Fold regulation<sup>a, b</sup></b> |
|-------------------------|------------------|------------------------|---------------------------------------|
| ACV-0290189             | CKS-2808         | hypothetical protein   | 13.2 ( R )                            |
| ACV-0286341             | CKS-4374         | hypothetical protein   | 9.6 ( R )                             |
| ACV-0285926             | CKS-2106         | hypothetical protein   | 8.3 ( R )                             |
| ACV-0286469             | CKS-3217         | hypothetical protein   | 8.3 ( R )                             |
| ACV-0290064             | CKS-3594         | hypothetical protein   | 6.8 ( R )                             |
| ACV-0288716             | CKS-1515         | hypothetical protein   | 6.8 ( R )                             |
| ACV-0290400             | CKS-0586         | hypothetical protein   | 6.6 ( R )                             |
| ACV-0286559             | CKS-3127         | hypothetical protein   | 5.7 ( R )                             |
| ACV-0288436             | CKS-0950         | hypothetical protein   | 5.2 ( R )                             |
| ACV-0291240             | CKS-3758         | hypothetical protein   | 4.5 ( R )                             |
| ACV-0290383             | CKS-0603         | hypothetical protein   | 4.4 ( R )                             |
| ACV-0290572             | CKS-0412         | hypothetical protein   | 4.3 ( R )                             |
| ACV-0286470             | CKS-3216         | hypothetical protein   | 4.2 ( R )                             |
| ACV-0286465             | CKS-3221         | hypothetical protein   | 4.2 ( R )                             |
| ACV-0288257             | CKS-4090         | hypothetical protein   | 4.2 ( R )                             |
| ACV-0286472             | CKS-3214         | hypothetical protein   | 4.2 ( R )                             |
| ACV-0286716             | CKS-2970         | hypothetical protein   | 4.0 ( R )                             |
| ACV-0286471             | CKS-3215         | hypothetical protein   | 4.0 ( R )                             |
| ACV-0288250             | CKS-4083         | hypothetical protein   | 3.9 ( R )                             |
| ACV-0288259             | CKS-4092         | hypothetical protein   | 3.8 ( R )                             |
| ACV-0290423             | CKS-0562         | hypothetical protein   | 3.8 ( R )                             |
| ACV-0288255             | CKS-4088         | hypothetical protein   | 3.7 ( R )                             |
| ACV-0288252             | CKS-4085         | hypothetical protein   | 3.7 ( R )                             |
| ACV-0288280             | CKS-4113         | hypothetical protein   | 3.6 ( R )                             |
| ACV-0288291             | CKS-4124         | hypothetical protein   | 3.5 ( R )                             |
| ACV-0286702             | CKS-2984         | hypothetical protein   | 3.5 ( R )                             |
| ACV-0287117             | CKS-1166         | hypothetical protein   | 3.5 ( R )                             |
| ACV-0286018             | CKS-2631         | hypothetical protein   | 3.5 ( R )                             |
| ACV-0286717             | CKS-2969         | hypothetical protein   | 3.3 ( R )                             |
| ACV-0288254             | CKS-4087         | hypothetical protein   | 3.3 ( R )                             |
| ACV-0286846             | CKS-2742         | hypothetical protein   | 3.3 ( R )                             |
| ACV-0288289             | CKS-4122         | hypothetical protein   | 3.2 ( R )                             |
| ACV-0288253             | CKS-4086         | hypothetical protein   | 3.2 ( R )                             |
| ACV-0288251             | CKS-4084         | hypothetical protein   | 3.2 ( R )                             |
| ACV-0288884             | CKS-4678         | hypothetical protein   | 3.1 ( R )                             |

|             |          |                      |           |
|-------------|----------|----------------------|-----------|
| ACV-0290401 | CKS-0585 | hypothetical protein | 3.1 ( R ) |
| ACV-0286009 | CKS-2622 | hypothetical protein | 3.1 ( R ) |
| ACV-0286747 | CKS-5576 | hypothetical protein | 3.0 ( R ) |
| ACV-0286468 | CKS-3218 | hypothetical protein | 2.9 ( R ) |
| ACV-0290440 | CKS-0545 | hypothetical protein | 2.9 ( R ) |
| ACV-0287288 | CKS-2472 | hypothetical protein | 2.9 ( R ) |
| ACV-0290338 | CKS-0648 | hypothetical protein | 2.9 ( R ) |
| ACV-0286464 | CKS-3222 | hypothetical protein | 2.9 ( R ) |
| ACV-0288311 | CKS-4144 | hypothetical protein | 2.9 ( R ) |
| ACV-0286725 | CKS-2961 | hypothetical protein | 2.8 ( R ) |
| ACV-0291013 | CKS-5649 | hypothetical protein | 2.8 ( R ) |
| ACV-0290586 | CKS-0398 | hypothetical protein | 2.8 ( R ) |
| ACV-0288262 | CKS-4095 | hypothetical protein | 2.8 ( R ) |
| ACV-0290849 | CKS-0134 | hypothetical protein | 2.8 ( R ) |
| ACV-0286090 | CKS-5382 | hypothetical protein | 2.8 ( R ) |
| ACV-0286067 | CKS-5359 | hypothetical protein | 2.7 ( R ) |
| ACV-0287104 | CKS-1179 | hypothetical protein | 2.7 ( R ) |
| ACV-0288258 | CKS-4091 | hypothetical protein | 2.7 ( R ) |
| ACV-0286778 | CKS-5608 | hypothetical protein | 2.7 ( R ) |
| ACV-0291350 | CKS-1465 | hypothetical protein | 2.6 ( R ) |
| ACV-0287058 | CKS-1225 | hypothetical protein | 2.6 ( R ) |
| ACV-0286786 | CKS-5616 | hypothetical protein | 2.6 ( R ) |
| ACV-0288268 | CKS-4101 | hypothetical protein | 2.6 ( R ) |
| ACV-0288404 | CKS-0982 | hypothetical protein | 2.6 ( R ) |
| ACV-0288256 | CKS-4089 | hypothetical protein | 2.6 ( R ) |
| ACV-0287344 | CKS-2416 | hypothetical protein | 2.6 ( R ) |
| ACV-0287877 | CKS-5525 | hypothetical protein | 2.5 ( R ) |
| ACV-0290025 | CKS-0027 | hypothetical protein | 2.5 ( R ) |
| ACV-0286709 | CKS-2977 | hypothetical protein | 2.5 ( R ) |
| ACV-0286489 | CKS-3197 | hypothetical protein | 2.5 ( R ) |
| ACV-0286019 | CKS-2632 | hypothetical protein | 2.5 ( R ) |
| ACV-0288241 | CKS-4074 | hypothetical protein | 2.5 ( R ) |
| ACV-0288248 | CKS-4081 | hypothetical protein | 2.5 ( R ) |
| ACV-0290835 | CKS-0148 | hypothetical protein | 2.5 ( R ) |
| ACV-0285875 | CKS-2055 | hypothetical protein | 2.5 ( R ) |
| ACV-0286010 | CKS-2623 | hypothetical protein | 2.5 ( R ) |
| ACV-0287359 | CKS-2401 | hypothetical protein | 2.5 ( R ) |
| ACV-0288305 | CKS-4138 | hypothetical protein | 2.4 ( R ) |
| ACV-0286753 | CKS-5583 | hypothetical protein | 2.4 ( R ) |

|             |          |                      |           |
|-------------|----------|----------------------|-----------|
| ACV-0291002 | CKS-5638 | hypothetical protein | 2.4 ( R ) |
| ACV-0286152 | CKS-4543 | hypothetical protein | 2.4 ( R ) |
| ACV-0290527 | CKS-0457 | hypothetical protein | 2.4 ( R ) |
| ACV-0286701 | CKS-2985 | hypothetical protein | 2.4 ( R ) |
| ACV-0289583 | CKS-2202 | hypothetical protein | 2.4 ( R ) |
| ACV-0287560 | CKS-5020 | hypothetical protein | 2.4 ( R ) |
| ACV-0286739 | CKS-5568 | hypothetical protein | 2.4 ( R ) |
| ACV-0290357 | CKS-0629 | hypothetical protein | 2.4 ( R ) |
| ACV-0290075 | CKS-3605 | hypothetical protein | 2.4 ( R ) |
| ACV-0285778 | CKS-1958 | hypothetical protein | 2.4 ( R ) |
| ACV-0287878 | CKS-5526 | hypothetical protein | 2.4 ( R ) |
| ACV-0286165 | CKS-4556 | hypothetical protein | 2.4 ( R ) |
| ACV-0290587 | CKS-0397 | hypothetical protein | 2.3 ( R ) |
| ACV-0288639 | CKS-4450 | hypothetical protein | 2.3 ( R ) |
| ACV-0286219 | CKS-4610 | hypothetical protein | 2.3 ( R ) |
| ACV-0287393 | CKS-2367 | hypothetical protein | 2.3 ( R ) |
| ACV-0290999 | CKS-5635 | hypothetical protein | 2.3 ( R ) |
| ACV-0290567 | CKS-0417 | hypothetical protein | 2.3 ( R ) |
| ACV-0290577 | CKS-0407 | hypothetical protein | 2.3 ( R ) |
| ACV-0286014 | CKS-2627 | hypothetical protein | 2.3 ( R ) |
| ACV-0289687 | CKS-3294 | hypothetical protein | 2.3 ( R ) |
| ACV-0287339 | CKS-2421 | hypothetical protein | 2.3 ( R ) |
| ACV-0290832 | CKS-0151 | hypothetical protein | 2.3 ( R ) |
| ACV-0290887 | CKS-0095 | hypothetical protein | 2.3 ( R ) |
| ACV-0289708 | CKS-3315 | hypothetical protein | 2.2 ( R ) |
| ACV-0286182 | CKS-4573 | hypothetical protein | 2.2 ( R ) |
| ACV-0286024 | CKS-2637 | hypothetical protein | 2.2 ( R ) |
| ACV-0290059 | CKS-3589 | hypothetical protein | 2.2 ( R ) |
| ACV-0286406 | CKS-3280 | hypothetical protein | 2.2 ( R ) |
| ACV-0288243 | CKS-4076 | hypothetical protein | 2.2 ( R ) |
| ACV-0286772 | CKS-5602 | hypothetical protein | 2.2 ( R ) |
| ACV-0286085 | CKS-5377 | hypothetical protein | 2.2 ( R ) |
| ACV-0286099 | CKS-4490 | hypothetical protein | 2.2 ( R ) |
| ACV-0285986 | CKS-2599 | hypothetical protein | 2.1 ( R ) |
| ACV-0288983 | CKS-4777 | hypothetical protein | 2.1 ( R ) |
| ACV-0289694 | CKS-3301 | hypothetical protein | 2.1 ( R ) |
| ACV-0290622 | CKS-0362 | hypothetical protein | 2.1 ( R ) |
| ACV-0290889 | CKS-0093 | hypothetical protein | 2.1 ( R ) |
| ACV-0286022 | CKS-2635 | hypothetical protein | 2.1 ( R ) |

|             |          |                      |           |
|-------------|----------|----------------------|-----------|
| ACV-0288304 | CKS-4137 | hypothetical protein | 2.1 ( R ) |
| ACV-0289820 | CKS-3430 | hypothetical protein | 2.1 ( R ) |
| ACV-0287039 | CKS-4274 | hypothetical protein | 2.1 ( R ) |
| ACV-0290653 | CKS-0331 | hypothetical protein | 2.1 ( R ) |
| ACV-0286008 | CKS-2621 | hypothetical protein | 2.1 ( R ) |
| ACV-0286575 | CKS-3111 | hypothetical protein | 2.1 ( R ) |
| ACV-0286163 | CKS-4554 | hypothetical protein | 2.1 ( R ) |
| ACV-0289922 | CKS-5453 | hypothetical protein | 2.1 ( R ) |
| ACV-0287107 | CKS-1176 | hypothetical protein | 2.1 ( R ) |
| ACV-0286181 | CKS-4572 | hypothetical protein | 2.1 ( R ) |
| ACV-0286712 | CKS-2974 | hypothetical protein | 2.1 ( R ) |
| ACV-0287984 | CKS-1751 | hypothetical protein | 2.1 ( R ) |
| ACV-0288911 | CKS-4705 | hypothetical protein | 2.1 ( R ) |
| ACV-0286351 | CKS-4384 | hypothetical protein | 2.1 ( R ) |
| ACV-0290847 | CKS-0136 | hypothetical protein | 2.1 ( R ) |
| ACV-0290895 | CKS-0086 | hypothetical protein | 2.1 ( R ) |
| ACV-0286011 | CKS-2624 | hypothetical protein | 2.0 ( R ) |
| ACV-0287342 | CKS-2418 | hypothetical protein | 2.0 ( R ) |
| ACV-0288739 | CKS-1538 | hypothetical protein | 2.0 ( R ) |
| ACV-0286407 | CKS-3279 | hypothetical protein | 2.0 ( R ) |
| ACV-0289281 | CKS-3522 | hypothetical protein | 2.0 ( R ) |
| ACV-0287328 | CKS-2432 | hypothetical protein | 2.0 ( R ) |
| ACV-0287036 | CKS-4271 | hypothetical protein | 2.0 ( R ) |
| ACV-0290104 | CKS-2893 | hypothetical protein | 2.0 ( R ) |
| ACV-0287915 | CKS-3662 | hypothetical protein | 2.0 ( R ) |
| ACV-0289394 | CKS-5316 | hypothetical protein | 2.0 ( A ) |
| ACV-0289127 | CKS-4924 | hypothetical protein | 2.0 ( A ) |
| ACV-0290880 | CKS-0102 | hypothetical protein | 2.0 ( A ) |
| ACV-0291354 | CKS-1469 | hypothetical protein | 2.1 ( A ) |
| ACV-0290672 | CKS-0312 | hypothetical protein | 2.1 ( A ) |
| ACV-0291020 | CKS-5656 | hypothetical protein | 2.1 ( A ) |
| ACV-0289218 | CKS-5487 | hypothetical protein | 2.1 ( A ) |
| ACV-0285736 | CKS-1915 | hypothetical protein | 2.2 ( A ) |
| ACV-0289244 | CKS-3559 | hypothetical protein | 2.2 ( A ) |
| ACV-0289165 | CKS-4962 | hypothetical protein | 2.3 ( A ) |
| ACV-0290048 | CKS-3578 | hypothetical protein | 2.3 ( A ) |
| ACV-0290498 | CKS-0486 | hypothetical protein | 2.3 ( A ) |
| ACV-0287957 | CKS-3620 | hypothetical protein | 2.3 ( A ) |
| ACV-0289390 | CKS-5312 | hypothetical protein | 2.4 ( A ) |

|             |          |                      |            |
|-------------|----------|----------------------|------------|
| ACV-0287555 | CKS-5015 | hypothetical protein | 2.4 ( A )  |
| ACV-0289418 | CKS-5340 | hypothetical protein | 2.4 ( A )  |
| ACV-0286509 | CKS-3177 | hypothetical protein | 2.5 ( A )  |
| ACV-0290412 | CKS-0573 | hypothetical protein | 2.5 ( A )  |
| ACV-0286816 | CKS-5693 | hypothetical protein | 2.6 ( A )  |
| ACV-0287934 | CKS-3643 | hypothetical protein | 2.7 ( A )  |
| ACV-0290286 | CKS-0700 | hypothetical protein | 2.7 ( A )  |
| ACV-0287741 | CKS-5201 | hypothetical protein | 2.7 ( A )  |
| ACV-0287556 | CKS-5016 | hypothetical protein | 2.8 ( A )  |
| ACV-0290394 | CKS-0592 | hypothetical protein | 2.8 ( A )  |
| ACV-0287362 | CKS-2398 | hypothetical protein | 2.8 ( A )  |
| ACV-0290395 | CKS-0591 | hypothetical protein | 2.9 ( A )  |
| ACV-0286758 | CKS-5588 | hypothetical protein | 2.9 ( A )  |
| ACV-0286533 | CKS-3153 | hypothetical protein | 3.1 ( A )  |
| ACV-0290874 | CKS-0108 | hypothetical protein | 3.1 ( A )  |
| ACV-0285807 | CKS-1987 | hypothetical protein | 3.2 ( A )  |
| ACV-0285990 | CKS-2603 | hypothetical protein | 3.3 ( A )  |
| ACV-0289341 | CKS-1642 | hypothetical protein | 3.3 ( A )  |
| ACV-0289294 | CKS-3509 | hypothetical protein | 3.5 ( A )  |
| ACV-0285941 | CKS-2554 | hypothetical protein | 3.6 ( A )  |
| ACV-0290873 | CKS-0109 | hypothetical protein | 3.7 ( A )  |
| ACV-0289132 | CKS-4929 | hypothetical protein | 3.8 ( A )  |
| ACV-0290206 | CKS-2791 | hypothetical protein | 3.8 ( A )  |
| ACV-0287940 | CKS-3637 | hypothetical protein | 4.0 ( A )  |
| ACV-0290788 | CKS-0195 | hypothetical protein | 4.1 ( A )  |
| ACV-0286150 | CKS-4541 | hypothetical protein | 4.3 ( A )  |
| ACV-0287941 | CKS-3636 | hypothetical protein | 4.3 ( A )  |
| ACV-0286069 | CKS-5361 | hypothetical protein | 4.5 ( A )  |
| ACV-0285663 | CKS-1841 | hypothetical protein | 5.0 ( A )  |
| ACV-0285618 | CKS-1796 | hypothetical protein | 5.8 ( A )  |
| ACV-0288958 | CKS-4752 | hypothetical protein | 5.8 ( A )  |
| ACV-0287996 | CKS-1739 | hypothetical protein | 6.1 ( A )  |
| ACV-0287935 | CKS-3642 | hypothetical protein | 7.5 ( A )  |
| ACV-0286567 | CKS-3119 | hypothetical protein | 8.8 ( A )  |
| ACV-0288261 | CKS-4094 | hypothetical protein | 9.1 ( A )  |
| ACV-0290386 | CKS-0600 | hypothetical protein | 9.4 ( A )  |
| ACV-0289202 | CKS-5003 | hypothetical protein | 12.4 ( A ) |
| ACV-0287456 | CKS-3692 | hypothetical protein | 12.9 ( A ) |

<sup>a</sup> (A) denotes fold activation, (R) denotes fold repression by EsaR as seen in the RNA-Seq data

<sup>b</sup> The fold-change in expression of the unnamed hypothetical protein-encoding genes in v5b were computed using the normalization factors for the original analysis of the annotated genes in Table S1.
